# Supplementary material for: Unifying soil organic matter formation and persistence frameworks: the MEMS model
Source: Copernicus journal article supplement (doi:10.5194/bg-16-1225-2019), 2019-03-25
Supplement: Supplementary file 4 [file bg-16-1225-2019-supplement.zip]

Archive with 9 entries (9 files):
- Robertson_BG_FigS3.pdf
- Robertson et al (2019) BG_SUPP MEMS model_final.pdf
- bg-16-1225-2019-supplement-title-page.pdf
- Robertson_BG_FigS4.pdf
- Robertson_BG_FigS5.pdf
- Robertson_BG_FigS2.pdf
- Robertson_BG_FigS6.pdf
- Robertson_BG_FigS1.pdf
- Robertson_BG_FigS7.png
