# Supplementary material for: Unifying soil organic matter formation and persistence frameworks: the MEMS model
Source: Copernicus journal article supplement (doi:10.5194/bg-16-1225-2019), 2019-03-25
Supplement: Supplementary file 4 [file bg-16-1225-2019-supplement.zip › bg-16-1225-2019-supplement-title-page.pdf]

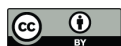

## *Supplement of*

# **Unifying soil organic matter formation and persistence frameworks: the MEMS model**

**Andy D. Robertson et al.**

*Correspondence to:* Andy D. Robertson ([andy.robertson@colostate.edu](mailto:andy.robertson@colostate.edu))

- [bg-16-1225-2019-supplement-title-page.pdf](#)
- [Robertson et al \(2019\) BG\\_SUPP MEMS model\\_final.pdf](#)
- [Robertson\\_BG\\_FigS1.pdf](#)
- [Robertson\\_BG\\_FigS2.pdf](#)
- [Robertson\\_BG\\_FigS3.pdf](#)
- [Robertson\\_BG\\_FigS4.pdf](#)
- [Robertson\\_BG\\_FigS5.pdf](#)
- [Robertson\\_BG\\_FigS6.pdf](#)
- [Robertson\\_BG\\_FigS7.png](#)

The copyright of individual parts of the supplement might differ from the CC BY 4.0 License.
