# Supplementary figures and images for: Unifying soil organic matter formation and persistence frameworks: the MEMS model
Source: Copernicus journal article supplement (doi:10.5194/bg-16-1225-2019), 2019-03-25

Topsoil (0–20 cm) carbon stock residuals ( $\text{Mg C ha}^{-1}$ )

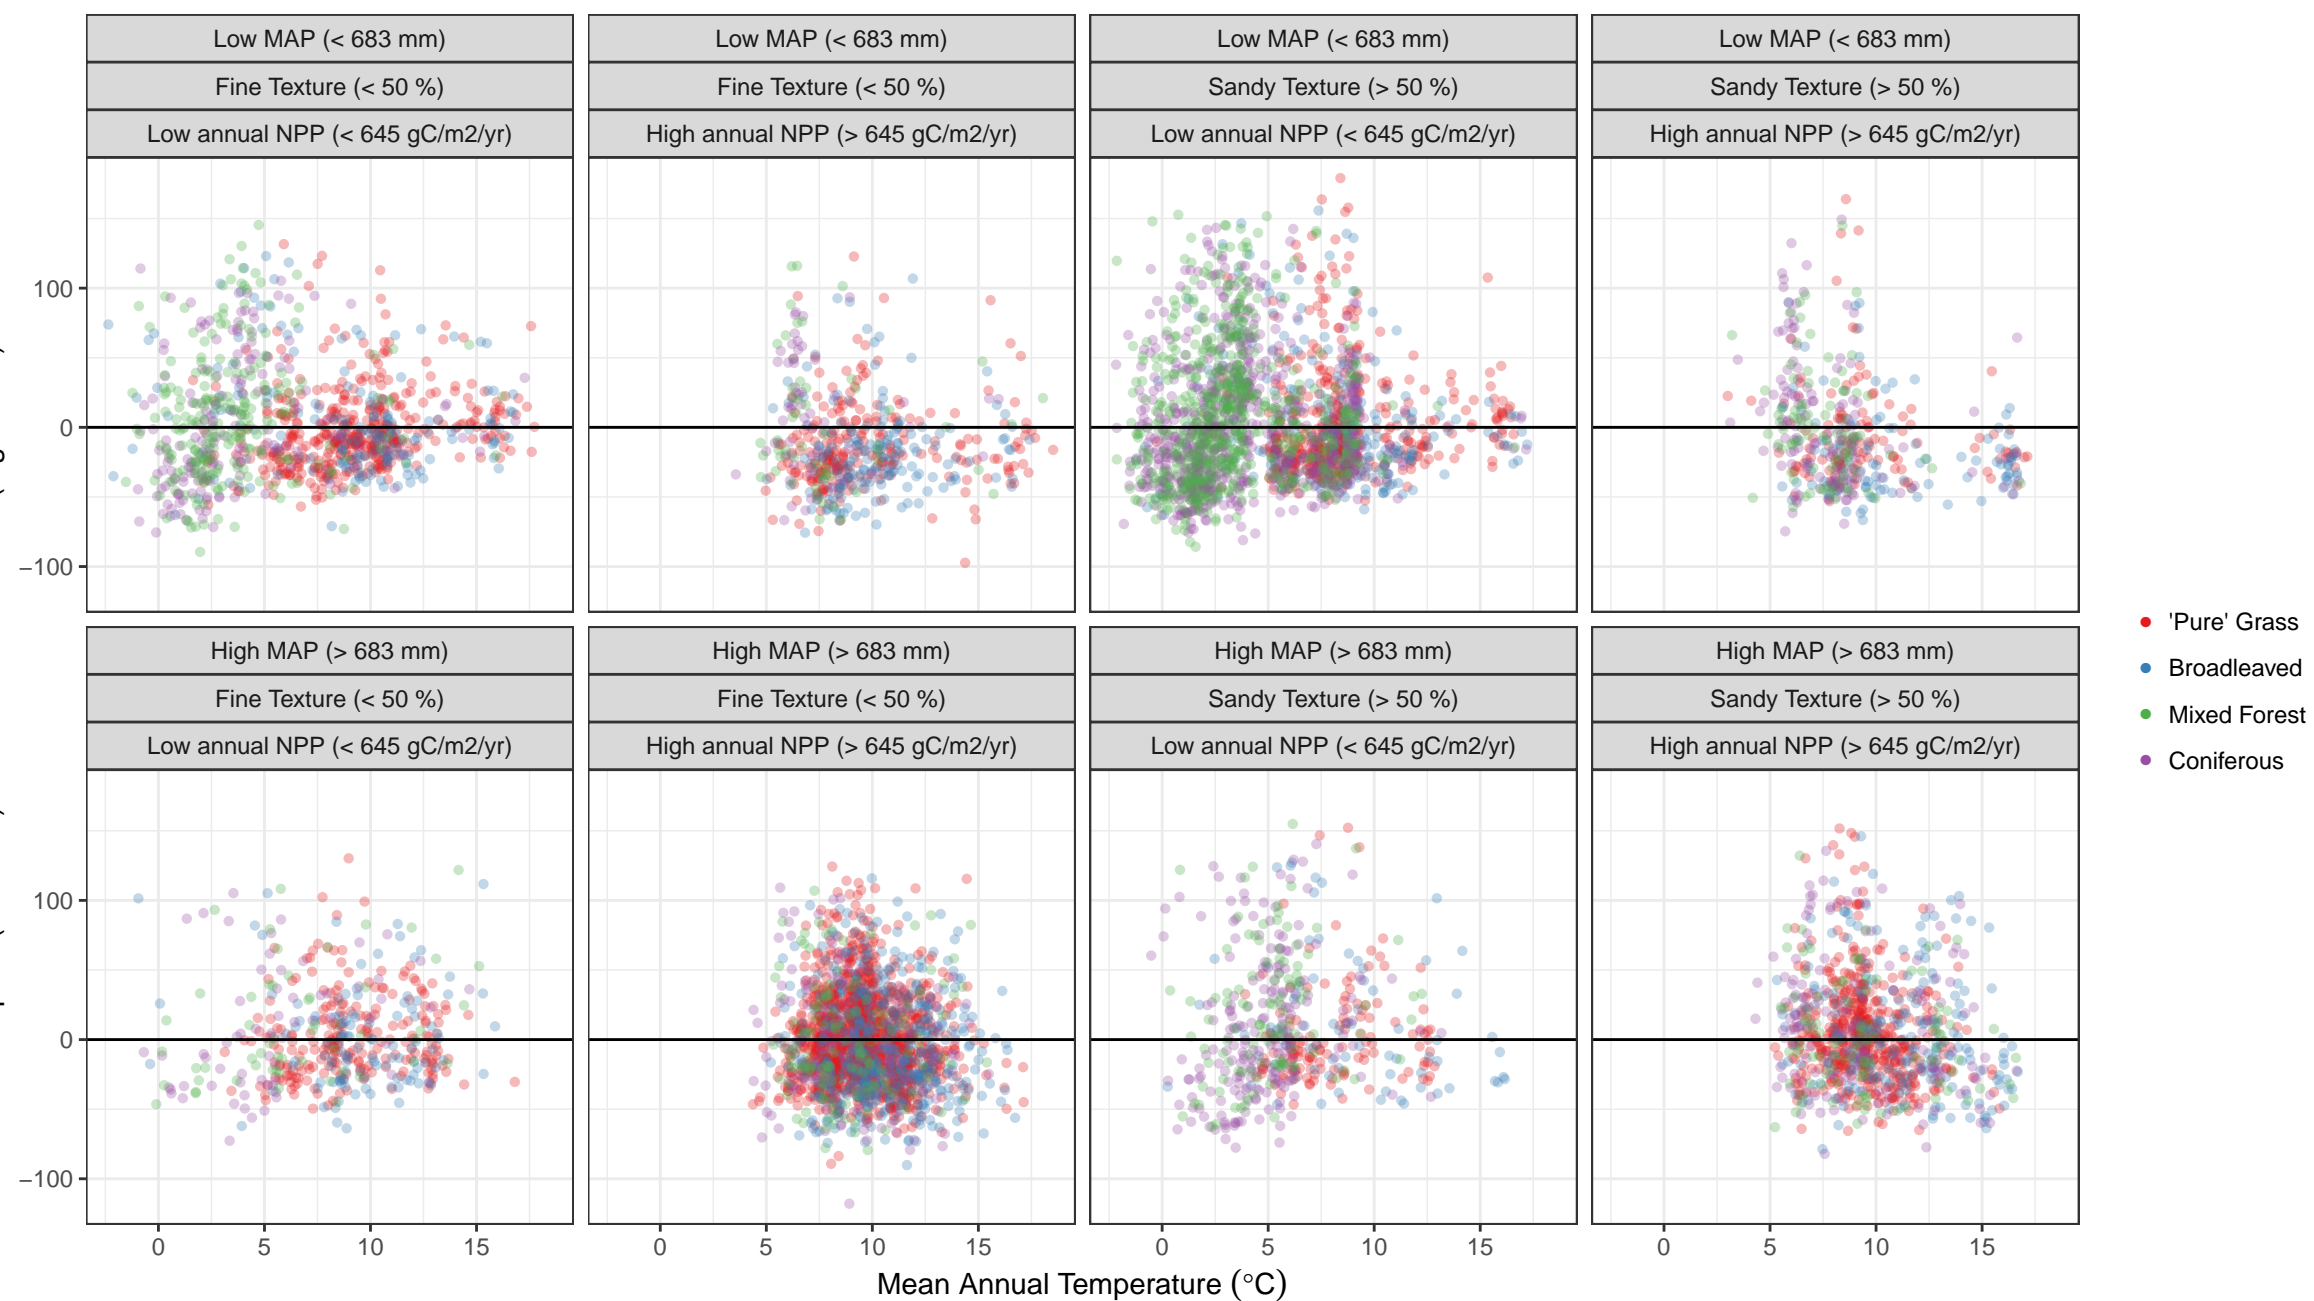

Supplement: Supplementary file 1 [file bg-16-1225-2019-supplement.zip]

Sand (%)

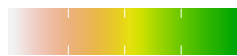

25 50 75

Annual Cin (gC/m2)

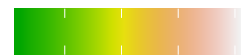

500 1000 1500 2000

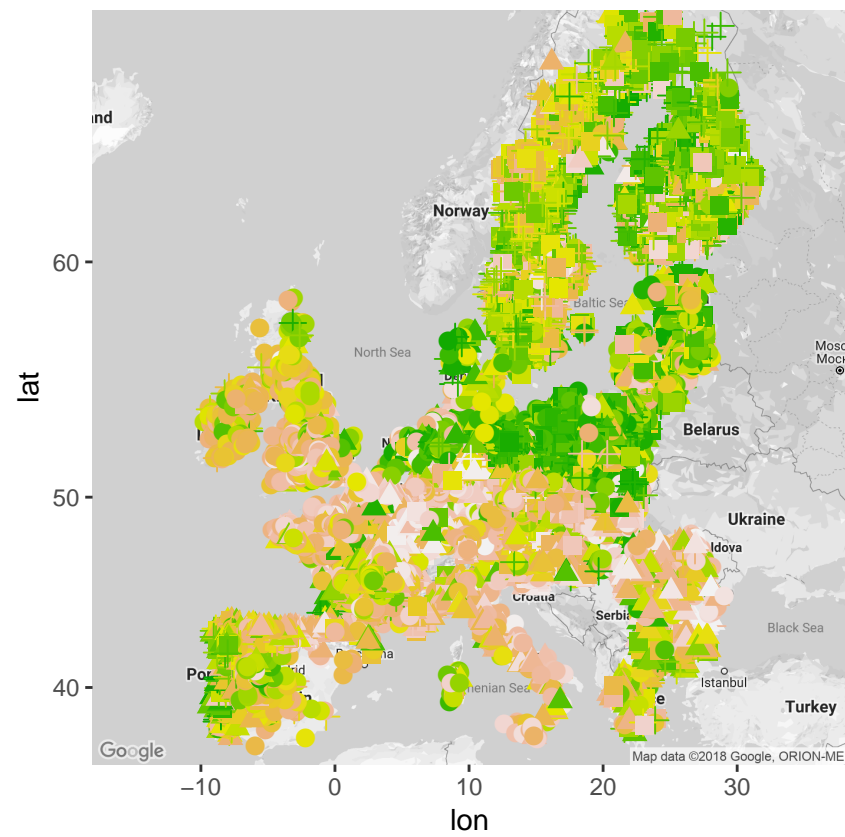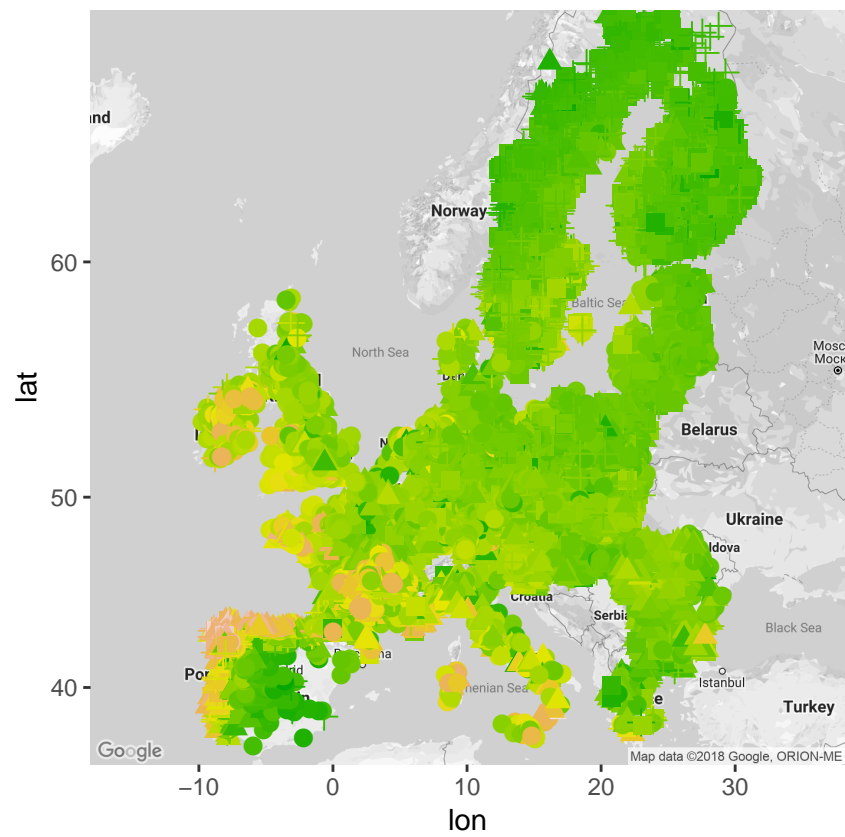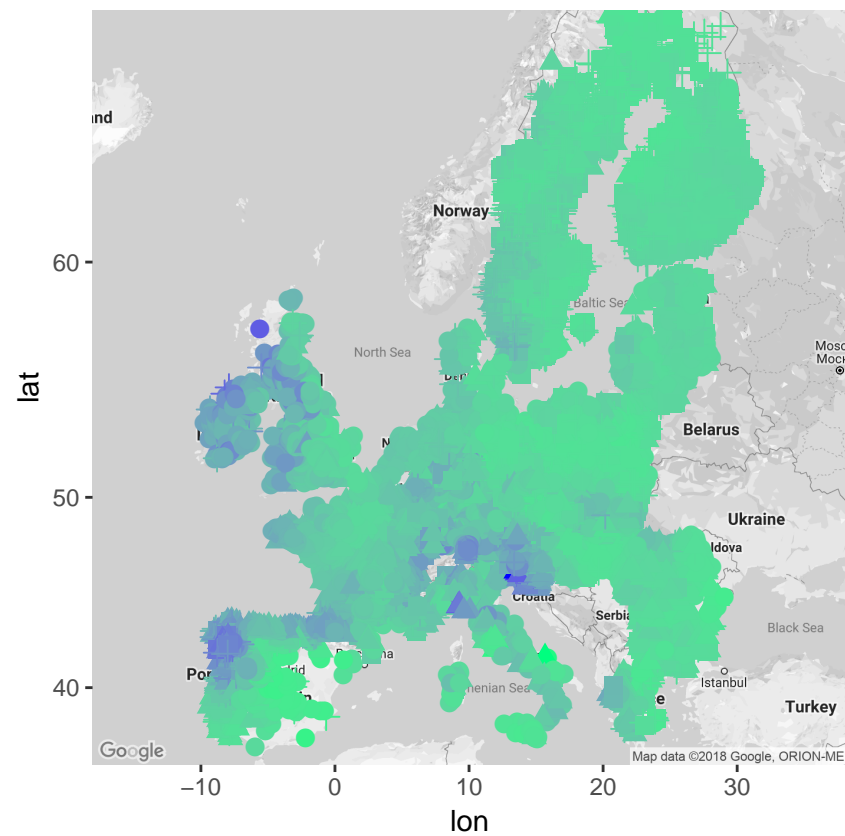

MAP (mm)

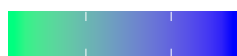

1000 2000

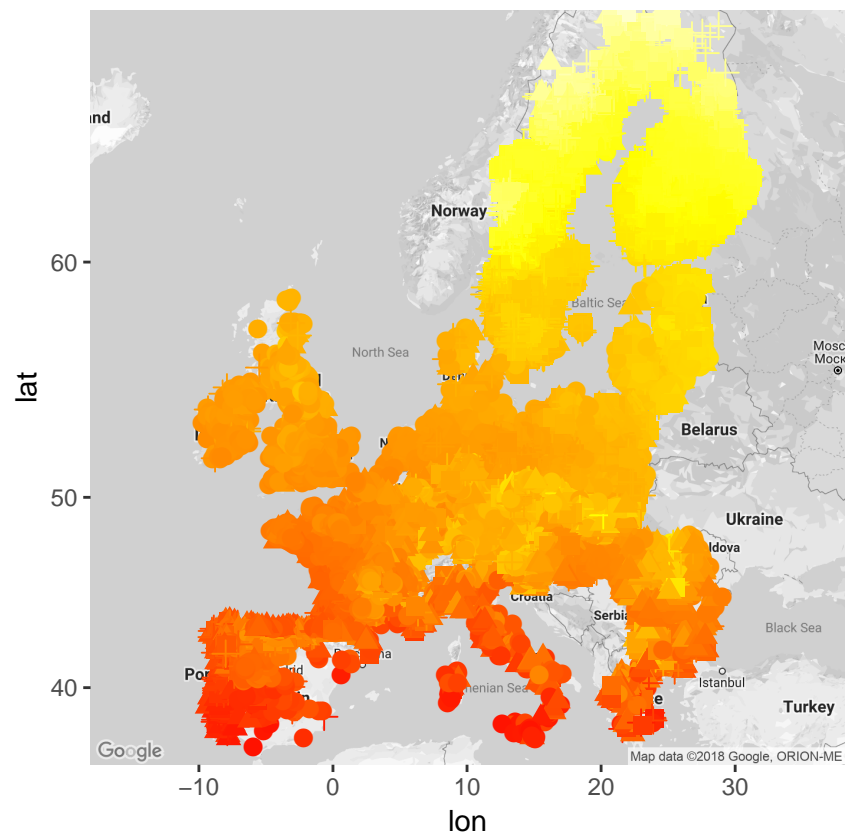

MAT (DegC)

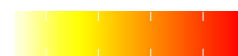

0 5 10 15

Supplement: Supplementary file 2 [file bg-16-1225-2019-supplement.zip]

Variable scale (see facet titles for units)

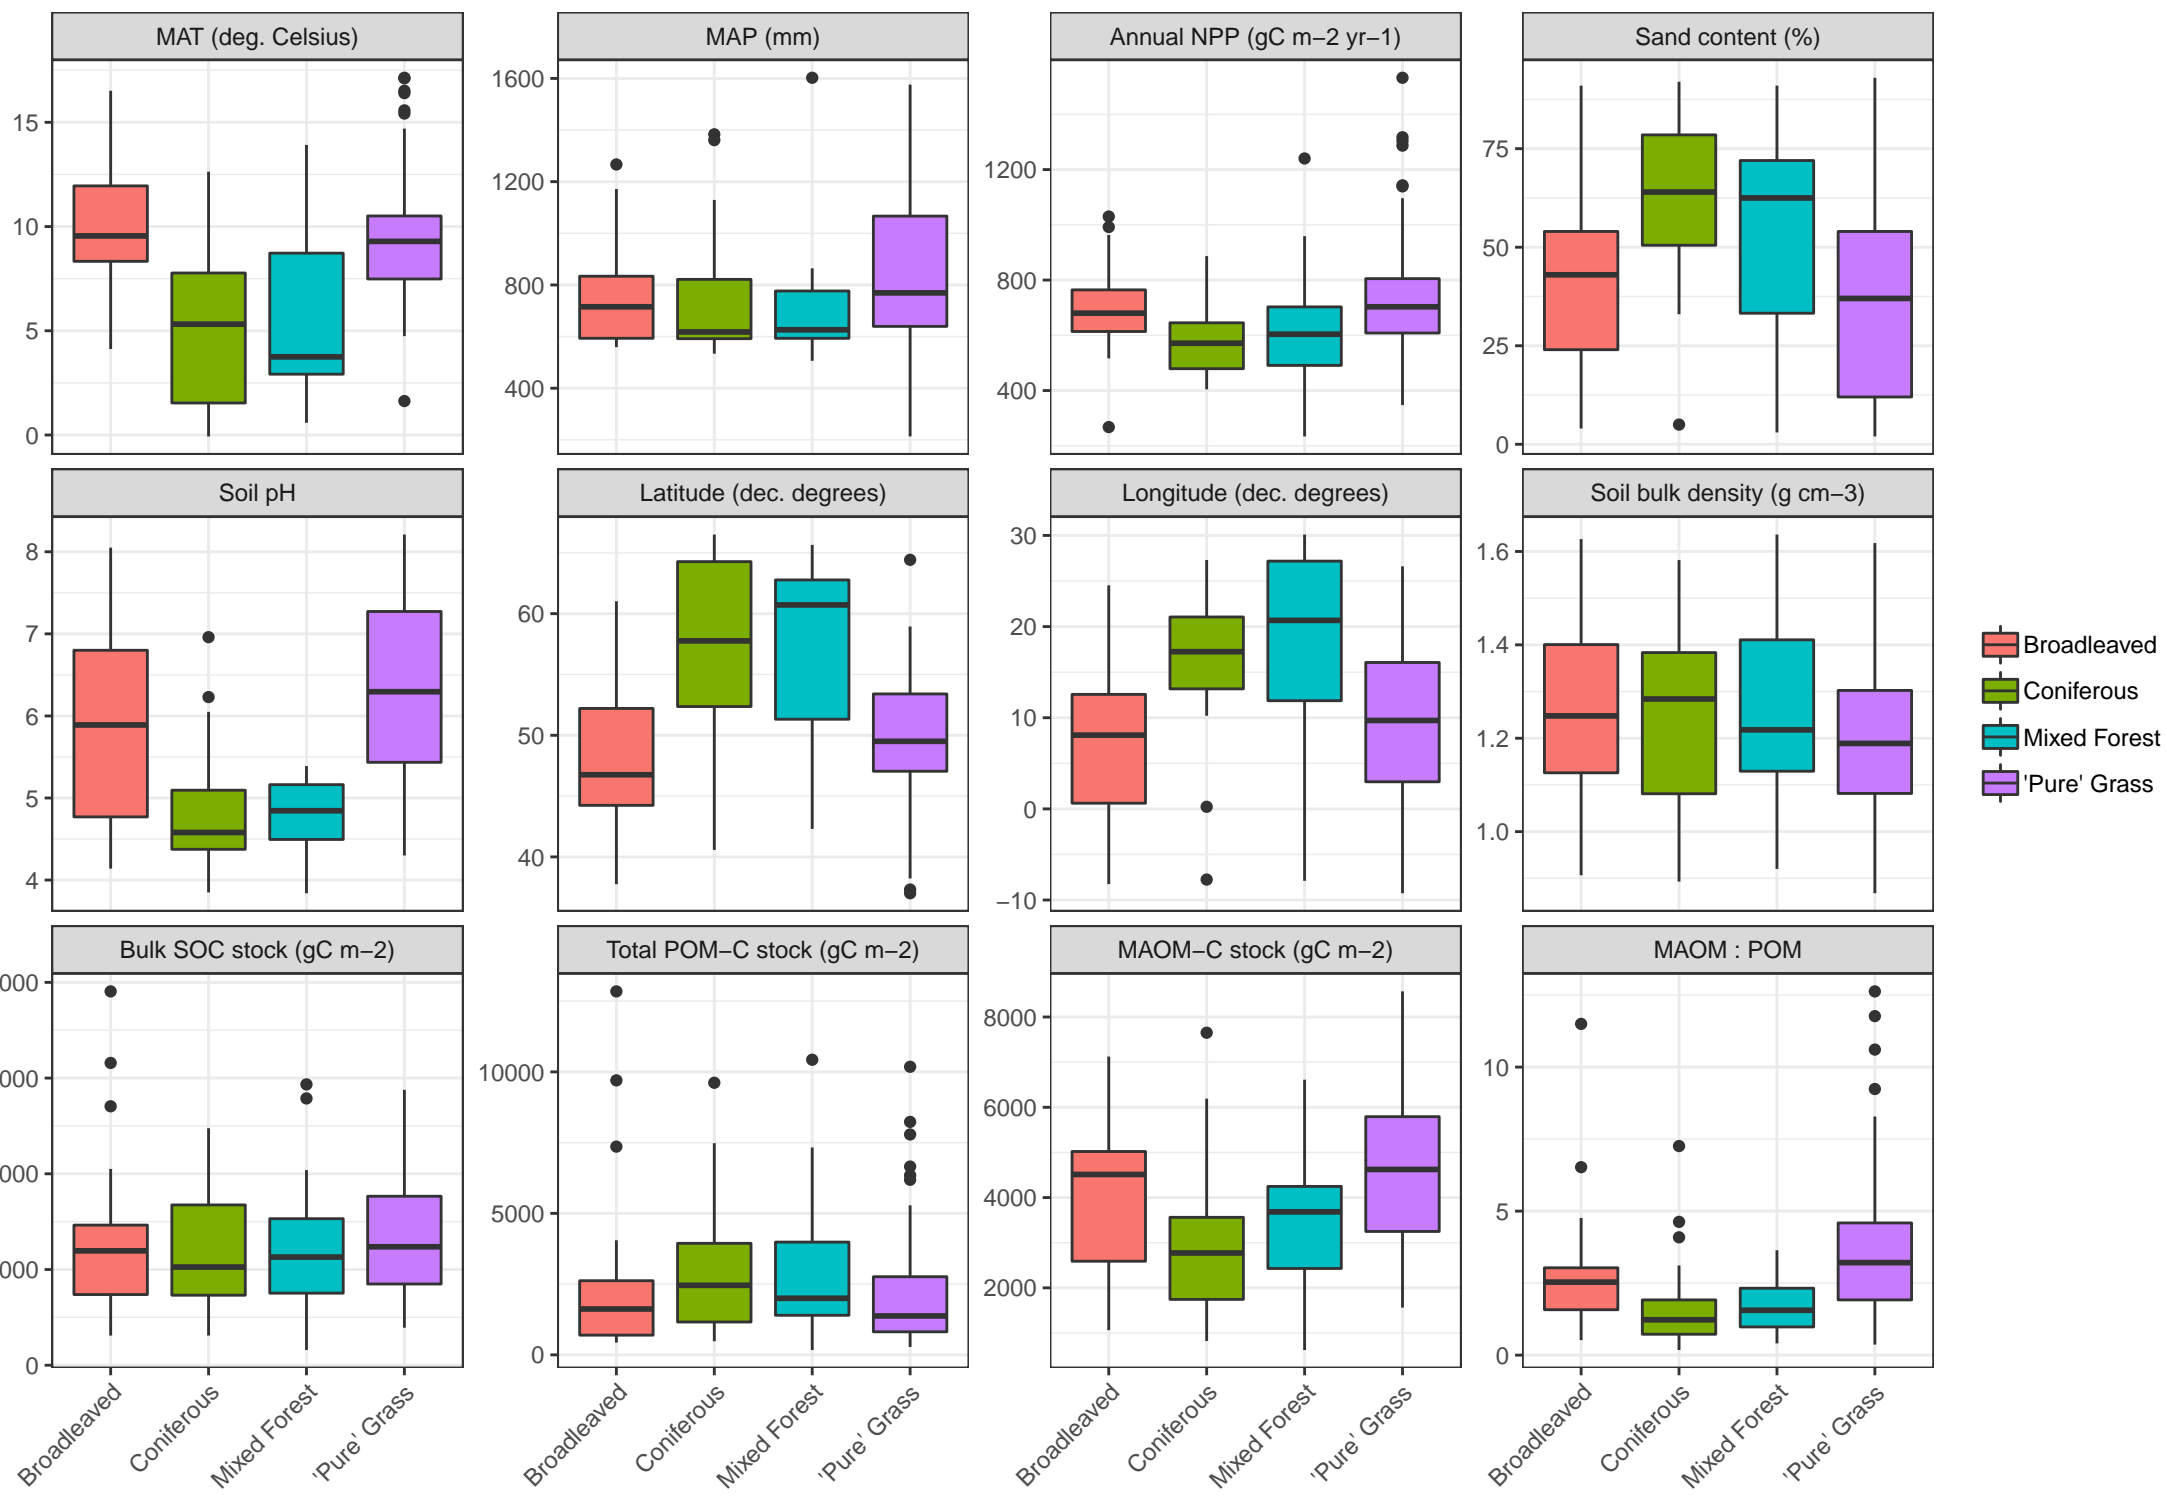

Supplement: Supplementary file 4 [file bg-16-1225-2019-supplement.zip › Robertson_BG_FigS3.pdf]

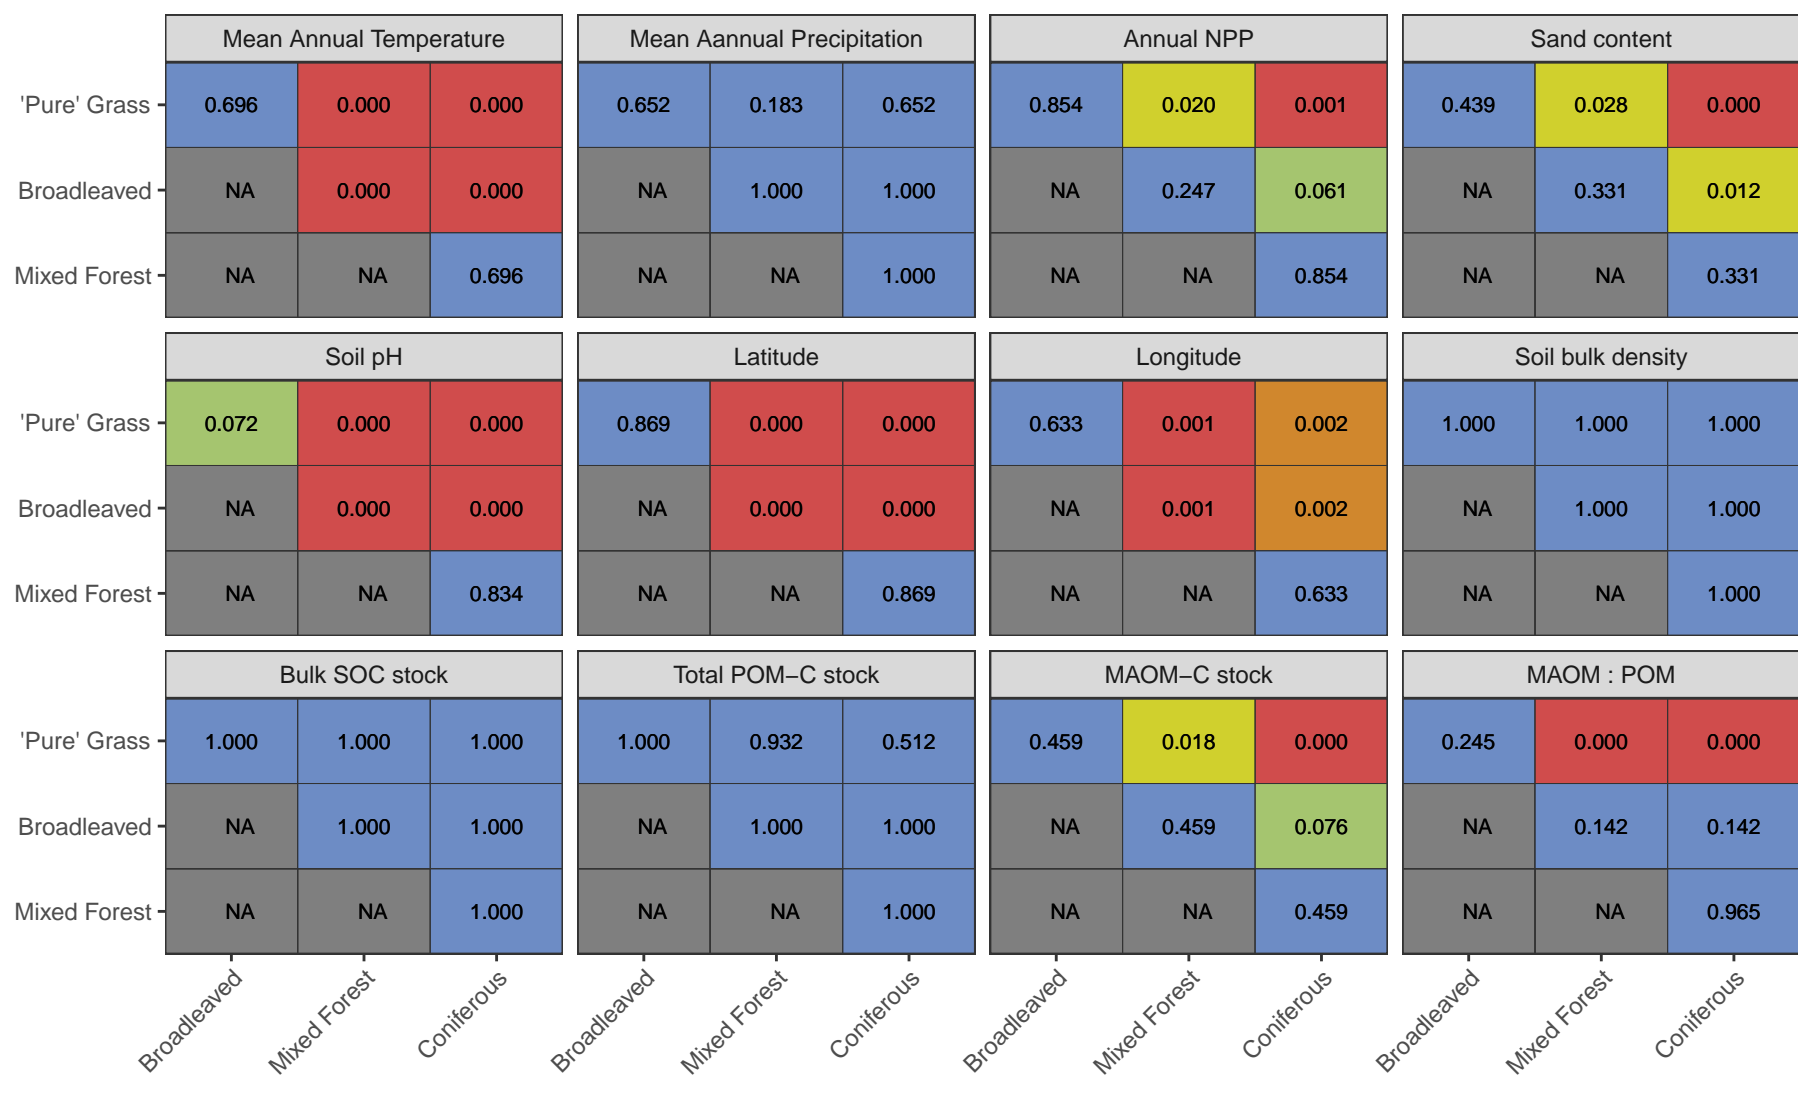

Supplement: Supplementary file 4 [file bg-16-1225-2019-supplement.zip › Robertson_BG_FigS4.pdf]

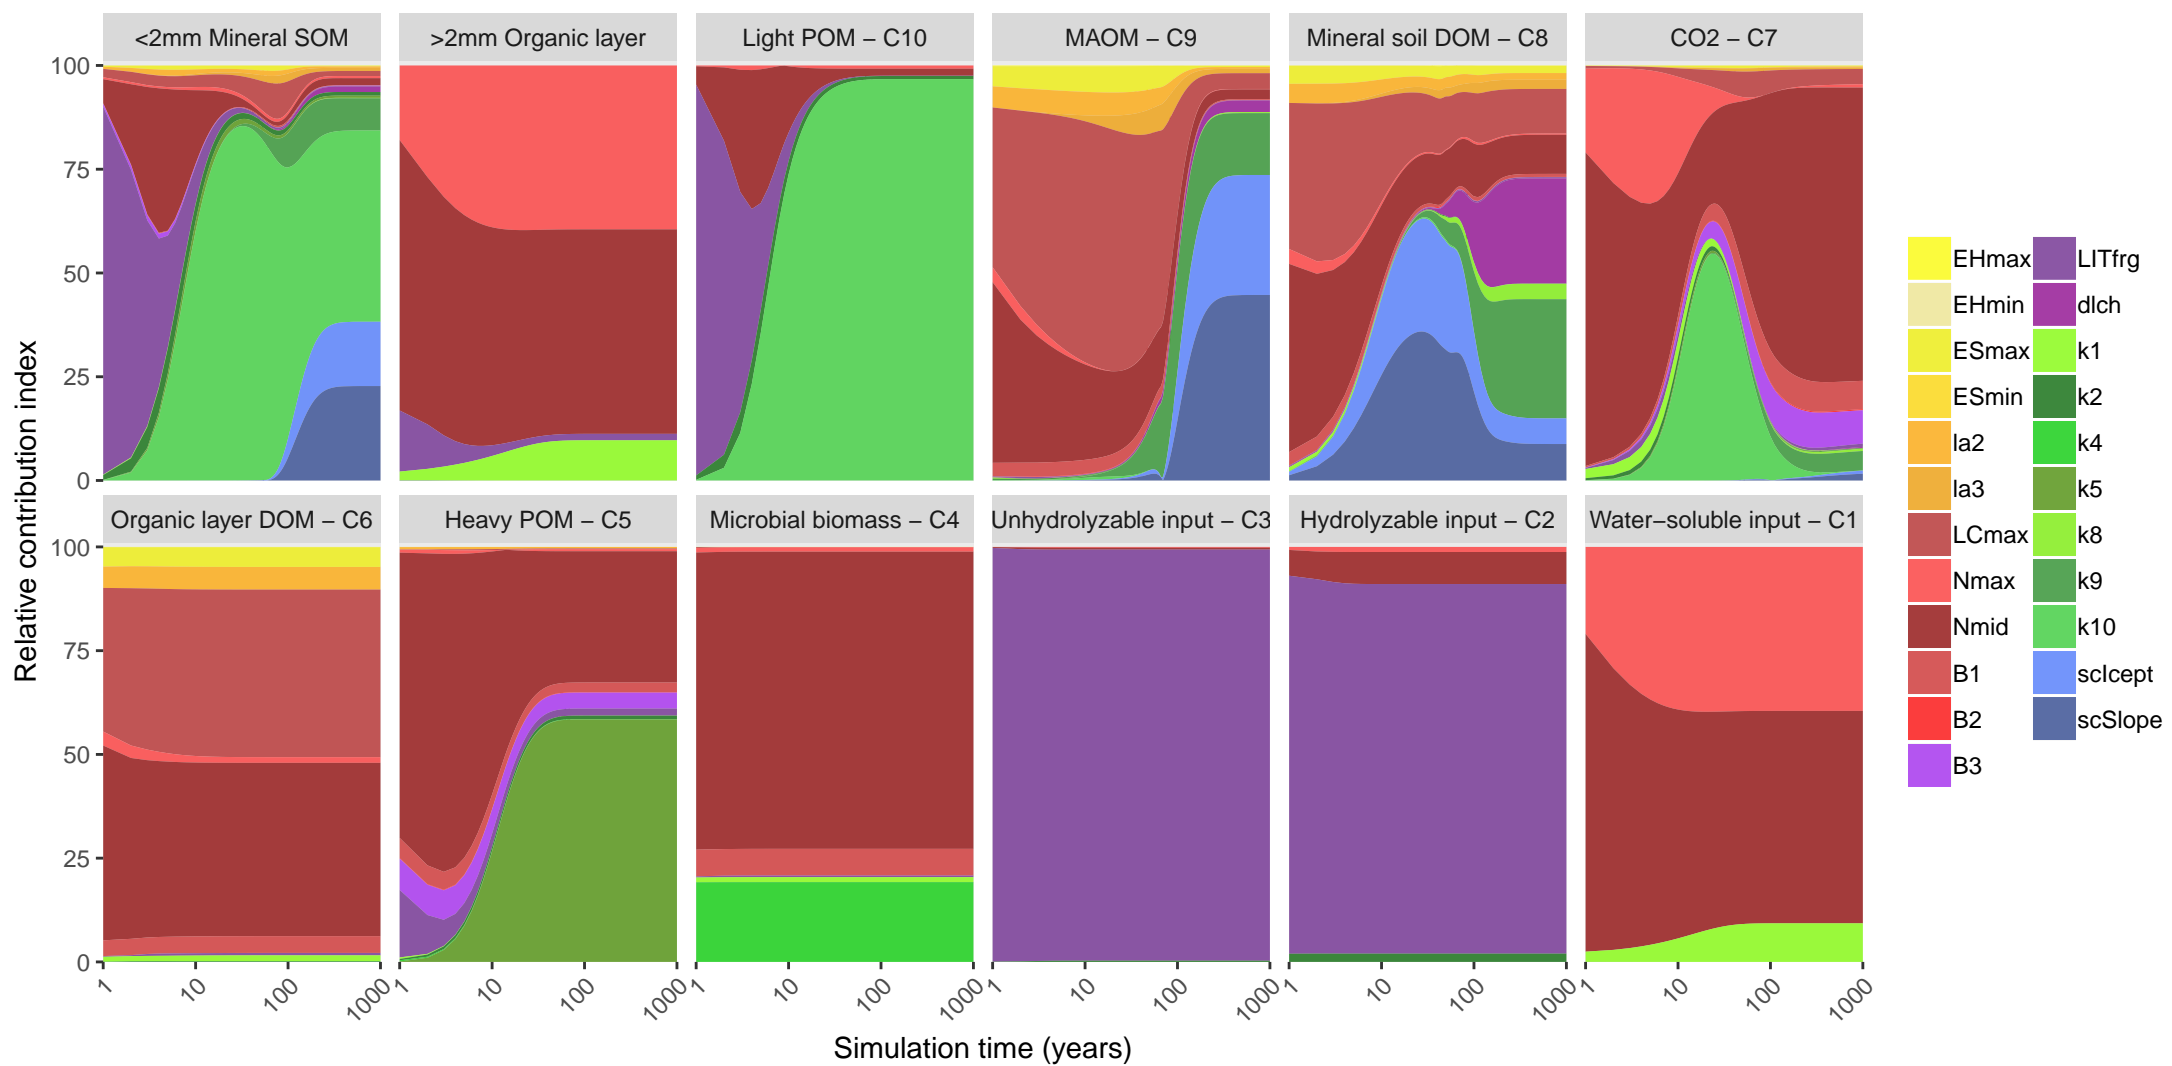

Supplement: Supplementary file 4 [file bg-16-1225-2019-supplement.zip › Robertson_BG_FigS5.pdf]

Sand (%)

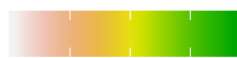

25 50 75

LandUse

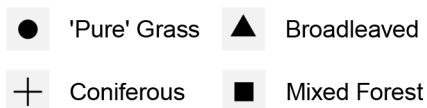

Annual Cin (gC/m2)

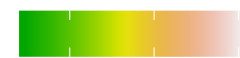

500 1000 1500

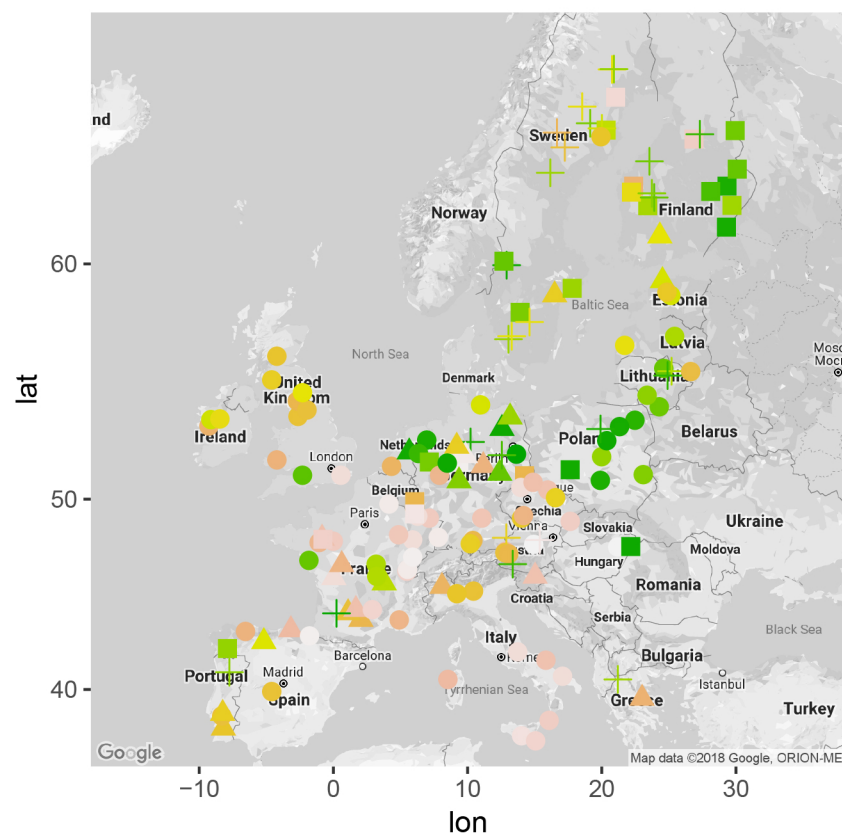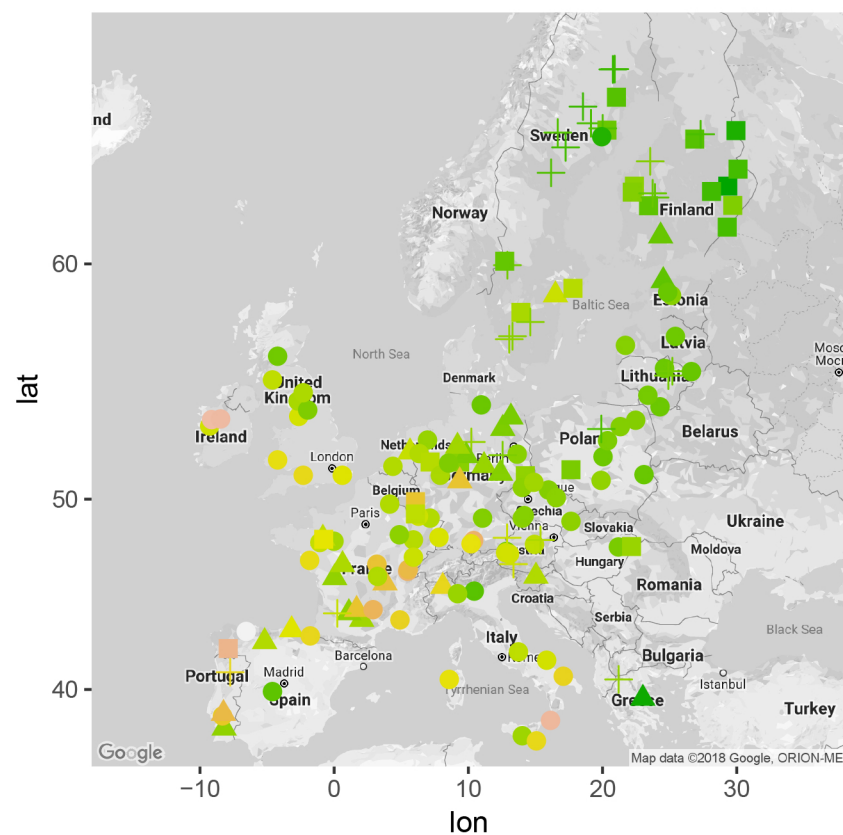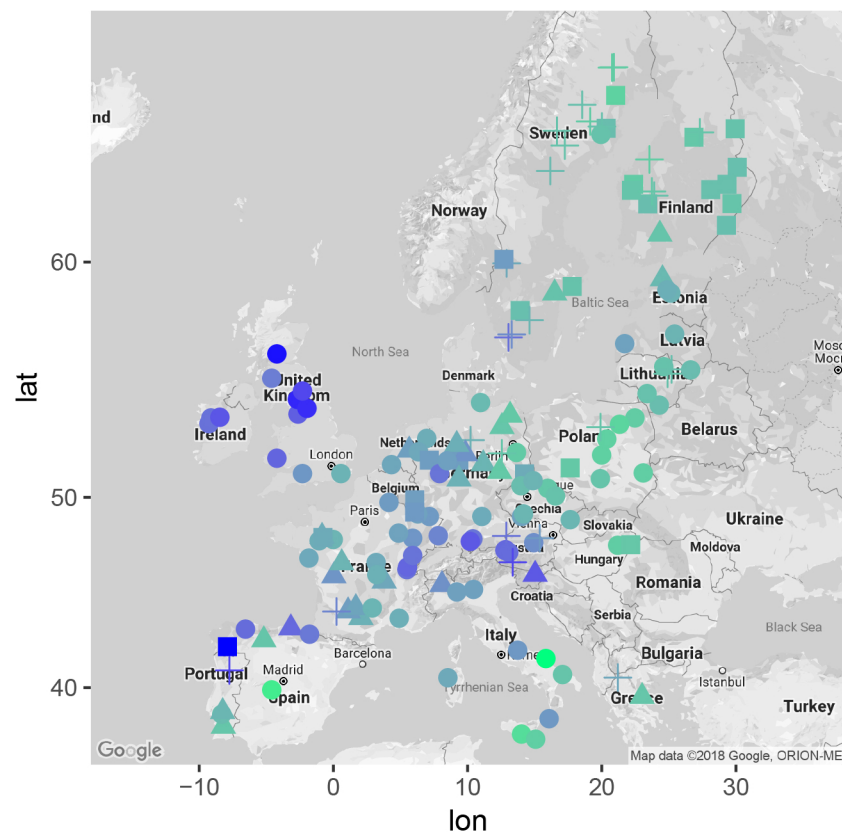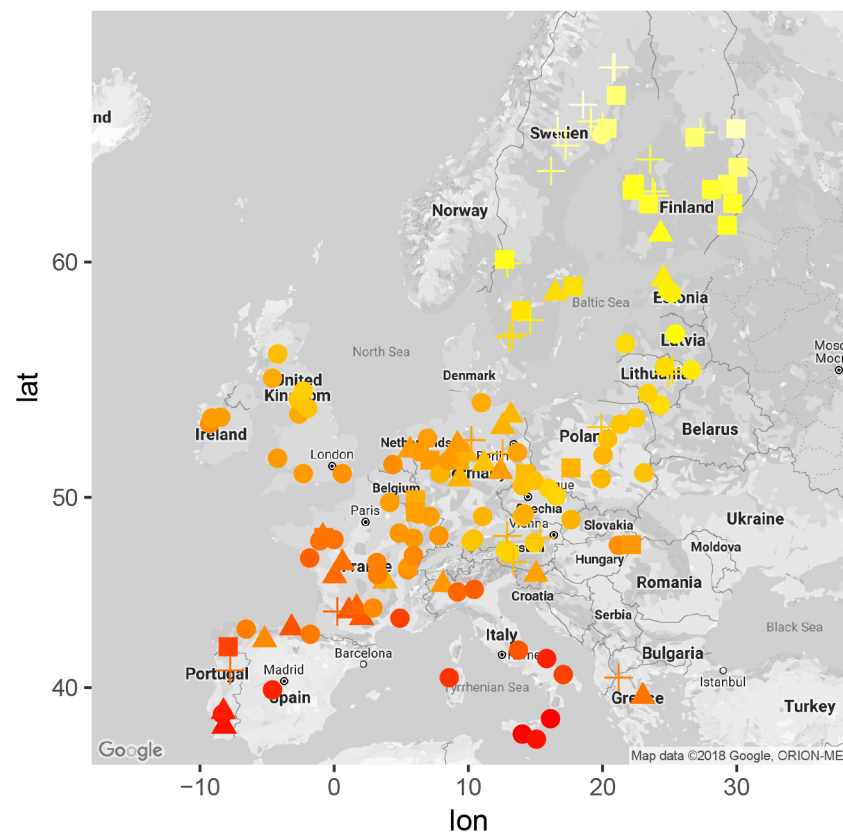

MAP (mm)

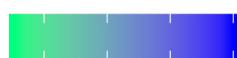

400 800 1200 1600

MAT (DegC)

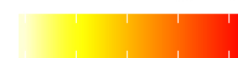

0 4 8 12 16

Supplement: Supplementary file 4 [file bg-16-1225-2019-supplement.zip › Robertson_BG_FigS2.pdf]

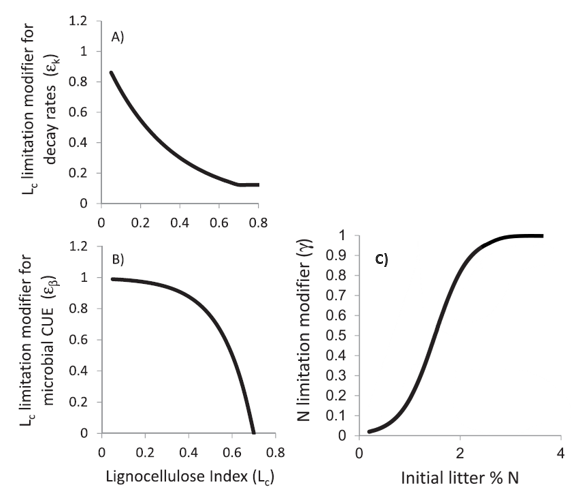

Supplement: Supplementary file 4 [file bg-16-1225-2019-supplement.zip › Robertson_BG_FigS7.png]
